# Supplementary figures and images for: Beneficial effects of Korean red ginseng on lymphocyte DNA damage, antioxidant enzyme activity, and LDL oxidation in healthy participants: a randomized, double-blind, placebo-controlled trial
Source: Springer Nature journal article supplement (doi:10.1186/1475-2891-11-47), 2012-07-17

A

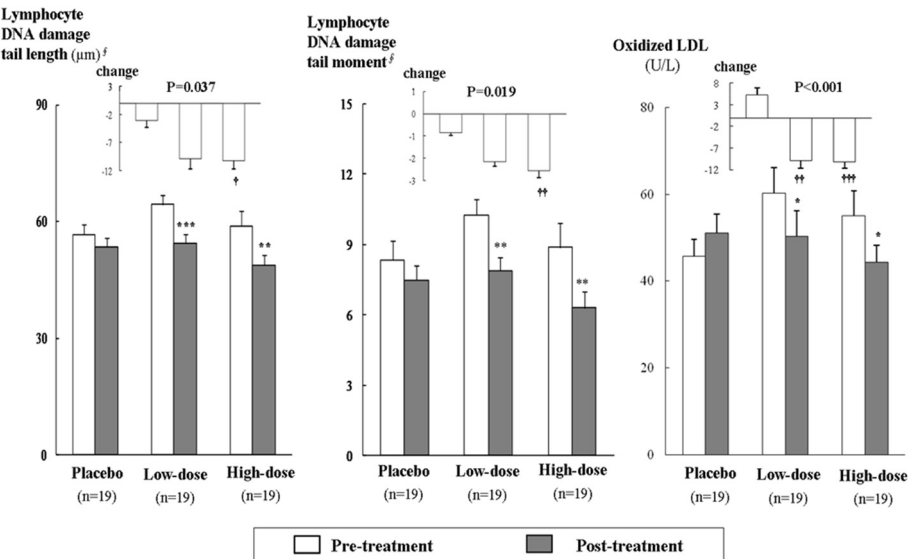

B

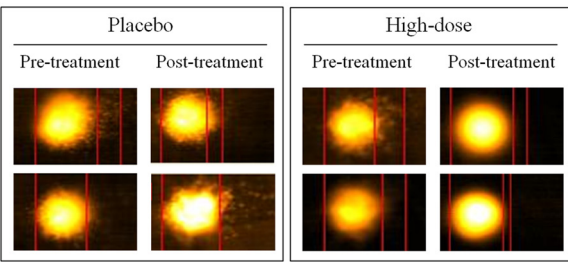

Supplement: 12937_2011_504_MOESM1_ESM.pdf [file 12937_2011_504_MOESM1_ESM.pdf]
